# Supplementary material
Source: MDPI journal article supplement (https://www.mdpi.com/2079-6412/11/6/702)
Supplement: s1 [file s1]

# Supplementary Materials: Combined Pulsed RF GD-OES and HAXPES for Quantified Depth Profiling through Coatings

Muriel Bouttemy <sup>1,\*</sup>, Solène Béchu <sup>1</sup>, Ben F. Spencer <sup>2</sup>, Pia Dally <sup>1,3</sup>, Patrick Chapon <sup>4</sup> and Arnaud Etcheberry <sup>1</sup>

<sup>1</sup> Institut Lavoisier de Versailles (ILV), Université de Versailles Saint-Quentin-en-Yvelines, Université Paris-Saclay, CNRS, UMR 8180, 45 avenue des Etats-Unis, CEDEX, 78035 Versailles, France; solene.bechu@uvsq.fr (S.B.); pia.dally@ipvf.fr (P.D.); arnaud.etcheberry@uvsq.fr (A.E.)

<sup>2</sup> Sir Henry Royce Institute and the Department of Materials, School of Natural Sciences, The University of Manchester, Manchester M13 9PL, UK; ben.spencer@manchester.ac.uk

<sup>3</sup> IPVF, Institut Photovoltaïque d'Ile-de-France, 18 Boulevard Thomas Gobert, 91120 Palaiseau, France

<sup>4</sup> HORIBA Scientific, 14 Boulevard Thomas Gobert, Passage Jobin Yvon, CS 45002, 91120 Palaiseau, France; patrick.chapon@horiba.com

\* Correspondence: muriel.bouttemy@uvsq.fr

**Table S1.** Evolution of the position and FWHM parameters for In 3d<sub>5/2</sub>, P 2p<sub>3/2</sub> and P 2s for XPS and HAXPES measurements.

| —      | —             | Photopeak    | In 3d <sub>5/2</sub> |             | P 2p <sub>3/2</sub> |             | P 2s          |             |
|--------|---------------|--------------|----------------------|-------------|---------------------|-------------|---------------|-------------|
|        |               | Contribution | Position (eV)        | FWHM (eV)   | Position (eV)       | FWHM (eV)   | Position (eV) | FWHM (eV)   |
| XPS    | Reference     | In P         | 444.5 ± 0.1          | 0.79 ± 0.02 | 128.7 ± 0.1         | 0.59 ± 0.02 | 186.5 ± 0.1   | 1.53 ± 0.02 |
|        |               | oxide        | 445.3 ± 0.1          | 1.18 ± 0.02 | 132.9 ± 0.1         | 1.09 ± 0.02 | 190.6 ± 0.1   | 2.35 ± 0.02 |
|        | GD-OES crater | In P         | 444.1 ± 0.1          | 1.04 ± 0.02 | 128.4 ± 0.1         | 0.83 ± 0.02 | 186.2 ± 0.1   | 1.64 ± 0.02 |
|        |               | oxide        | 445.1 ± 0.1          | 1.30 ± 0.02 | 132.9 ± 0.1         | 1.21 ± 0.02 | 190.3 ± 0.1   | 2.34 ± 0.02 |
|        |               | New          | N/A                  | N/A         | 128.9 ± 0.1         | 0.83 ± 0.02 | 187.0 ± 0.1   | 1.64 ± 0.02 |
| HAXPES | Reference     | In P         | 444.5 ± 0.2          | 1.48 ± 0.04 | 129.0 ± 0.2         | 1.65 ± 0.04 | 186.5 ± 0.2   | 1.53 ± 0.04 |
|        | GD-OES crater | In P         | 444.3 ± 0.2          | 1.49 ± 0.04 | 128.5 ± 0.2         | 1.72 ± 0.04 | 186.4 ± 0.2   | 2.06 ± 0.04 |

**Table S2.** Evolution of the position and FWHM parameters for In 2p<sub>3/2</sub> and P 1s for HAXPES measurements.

| —      | —             | Photopeak    | In 2p <sub>3/2</sub> |             | P 1s          |             |
|--------|---------------|--------------|----------------------|-------------|---------------|-------------|
|        |               | Contribution | Position (eV)        | FWHM (eV)   | Position (eV) | FWHM (eV)   |
| HAXPES | Reference     | In P         | 3731.7 ± 0.2         | 3.02 ± 0.04 | 2142.9 ± 0.2  | 1.66 ± 0.04 |
|        | GD-OES crater | In P         | 3731.1 ± 0.2         | 3.05 ± 0.04 | 2142.2 ± 0.2  | 1.75 ± 0.04 |
